# Supplementary material for: Adapting Agriculture Platforms for Nutrition: A Case Study of a Participatory, Video-Based Agricultural Extension Platform in India
Source: PLOS journal article supplement (doi:10.1371/journal.pone.0164002), 2016-10-13
Supplement: S8 (10.1371/journal.pone.0164002.s008) [file journal.pone.0164002.s008]

### SNA mapping

Name of the Village: \_\_\_\_\_

Index SHG member ID: \_\_\_\_\_

Full Name of the Index SHG Member/Source of information: \_\_\_\_\_

SNA administered to (tick the relevant SNA degree)- 1<sup>st</sup> Degree/ 2<sup>nd</sup> Degree

### Video No. 1 - Benefits of Hand washing with Soap

| S.NO       | Question                                                                                                              | Response                                                                                                                                                                                                                                                                                                            |
|------------|-----------------------------------------------------------------------------------------------------------------------|---------------------------------------------------------------------------------------------------------------------------------------------------------------------------------------------------------------------------------------------------------------------------------------------------------------------|
| <b>1</b>   | Has anyone in your community shared information on the benefits of <b>hand washing</b> with you in the last 3 months? | <b>Yes...1</b><br><b>No...2 If NO SKIP to 2</b>                                                                                                                                                                                                                                                                     |
| <b>1.1</b> | Who /what is the source of this information?                                                                          | Index SHG member... <b>1</b><br>AWW... <b>2</b><br>AHSA.... <b>3</b><br>ANM... <b>4</b><br>Doctor..... <b>5</b><br>Others within the HH: <b>6</b><br>Others outside the HH<br>(if not index SHG member)... <b>7</b><br>Radio.... <b>8</b><br>TV..... <b>9</b><br>Newspaper..... <b>10</b><br>Others, specify: _____ |

|     |                                                                                                                                                                                                                        |                                                                                                                                                                                                                                                                                                                                                                                       |
|-----|------------------------------------------------------------------------------------------------------------------------------------------------------------------------------------------------------------------------|---------------------------------------------------------------------------------------------------------------------------------------------------------------------------------------------------------------------------------------------------------------------------------------------------------------------------------------------------------------------------------------|
| 1.2 | <p>What specific message about hand washing did [Name of SHG member] share with you in the last 3 months? And how many times</p> <p><i>Encourage the respondent to talk about each message and what was shared</i></p> | <p>Explained how to wash hands.....1 Times <input type="text"/></p> <p>When should people wash their hands .....2 Times <input type="text"/></p> <p>The benefit of hand washing with soap?.....3 Times <input type="text"/></p>                                                                                                                                                       |
| 1.3 | <p>When [NAME] shared information with you about <b>how to wash hands</b> what specific practices were mentioned</p> <p><i>Check all that apply and write the detailed response in the text box</i></p>                | <p>Use soap .....1</p> <p>Rinse with clean AND running water (tippy tap or mug and bucket for pouring water).....2</p> <p>Rub palms together for lather.....3</p> <p>Scrub in between fingers, under nails, and backs of hands.....4</p> <p>Dry with clean cloth or air dry.....5</p> <p>Create a hand washing stations near the kitchen, latrine ..5</p> <p>Other, explain.....6</p> |
| 1.4 | <p>When [NAME] shared information with you about <b>when should people wash their hands what specific times for hand washing was mentioned?</b></p> <p><i>Check all that apply</i></p>                                 | <p>Before preparing food...1</p> <p>Before eating ...2</p> <p>Before feeding baby ....3</p> <p>Other, explain ....4</p>                                                                                                                                                                                                                                                               |
| 1.5 | <p>What did [NAME] convey about <b>the benefit of hand washing</b></p> <p><i>Check all that apply</i></p>                                                                                                              | <p>Prevents infections...1</p> <p><b>OTHER CODES.....2</b></p>                                                                                                                                                                                                                                                                                                                        |

|     |                                                                                                                       |                                                                                                                                                                                                                                                                                                                                                                                                                                                                                                                          |
|-----|-----------------------------------------------------------------------------------------------------------------------|--------------------------------------------------------------------------------------------------------------------------------------------------------------------------------------------------------------------------------------------------------------------------------------------------------------------------------------------------------------------------------------------------------------------------------------------------------------------------------------------------------------------------|
| 1.6 | Did you completely understand the message when it was shared to you?                                                  | <p>Yes, completely understood the entire message/practice that was shared.....1</p> <p>2-No, did not understand first but asked questions which the informant answered.....2</p> <p>3-No, did not understand even after asking questions because informant could not answer.....3</p> <p>4-No, did not understand and did not ask questions...4</p>                                                                                                                                                                      |
| 1.7 | <p>Have you tested any of the recommended behaviors that were shared to you?</p> <p><b>if tested, skip to 1.9</b></p> | <p>Haven't tested.....1</p> <p>Use soap .....2</p> <p>Rinse with clean AND running water (tippy tap or mug and bucket for pouring water).....3</p> <p>Rub palms together for lather.....4</p> <p>Scrub in between fingers, under nails, and backs of hands.....5</p> <p>Dry with clean cloth or air dry.....6</p> <p>Create a hand washing stations near the kitchen, latrine..7</p> <p>Washed hands Before preparing food...8</p> <p>Washed hands Before eating ...9</p> <p>Washed hands Before feeding baby ....10</p> |
| 1.8 | <p>If you have not tested the behavior/practice, why not?</p> <p><b>if not tested skip to 1.11</b></p>                | <p>Did not think important....1</p> <p>Lack of opportunity.....2</p> <p>Thought it was too complex....3</p> <p>Did not understand the information well....4</p> <p>Resource constraints....5</p> <p>Lack of family support...6</p> <p>Other, explain...7</p>                                                                                                                                                                                                                                                             |
| 1.9 | Which of the practices did you adopt consistently                                                                     | <p>Haven't adopted.....1</p> <p>Use soap .....2</p> <p>Rinse with clean AND running water (tippy tap or mug and bucket for pouring water).....3</p> <p>Rub palms together for lather.....4</p> <p>Scrub in between fingers, under nails, and backs of hands.....5</p> <p>Dry with clean cloth or air dry.....6</p> <p>Create a hand washing stations near the kitchen, latrine ..7</p> <p>Washed hands Before preparing food...8</p>                                                                                     |

|             |                                                                                  |                                                                                                                                                                                                                                                              |
|-------------|----------------------------------------------------------------------------------|--------------------------------------------------------------------------------------------------------------------------------------------------------------------------------------------------------------------------------------------------------------|
|             |                                                                                  | <p>Washed hands Before eating ...<b>9</b></p> <p>Washed hands Before feeding baby ....<b>10</b></p>                                                                                                                                                          |
| <b>1.10</b> | IF you have not adopted the behavior/practice, why not?                          | <p>Did not think important....1</p> <p>Lack of opportunity.....2</p> <p>Thought it was too complex....3</p> <p>Did not understand the information well....4</p> <p>Resource constraints....5</p> <p>Lack of family support...6</p> <p>Other, explain...7</p> |
| <b>1.11</b> | Have you shared the messages you heard about hand washing practices with any one | <p>Yes.....1, <b>if yes, skip to 1.13</b></p> <p>NO.....2</p>                                                                                                                                                                                                |
| <b>1.12</b> | If no, why? (note the qualitative response in the box)                           | <p>Did not think important....1</p> <p>Lack of opportunity.....2</p> <p>Thought it was too complex....3</p> <p>Did not understand the information well....4</p> <p>Did not think people will adopt....5</p> <p>Other, explain...6</p>                        |

|      |                                                                                                           |                                                                                                                                                                                                                                                                                                                                                                                                                                                                |                                                  |
|------|-----------------------------------------------------------------------------------------------------------|----------------------------------------------------------------------------------------------------------------------------------------------------------------------------------------------------------------------------------------------------------------------------------------------------------------------------------------------------------------------------------------------------------------------------------------------------------------|--------------------------------------------------|
| 1.13 | What specific practices did you recommend? And to whom (note the details of the person to follow-up with) | Use soap .....2<br>Rinse with clean AND running water (tippy tap or mug and bucket for pouring water).....3<br>Rub palms together for lather.....4<br>Scrub in between fingers, under nails, and backs of hands.....5<br>Dry with clean cloth or air dry.....6<br>Create a hand washing stations near the kitchen, latrine ..7<br>Washed hands Before preparing food...8<br><br>Washed hands Before eating ...9<br><br>Washed hands Before feeding baby ....10 | <b>WHOM and relationship<br/>(for follow up)</b> |
|------|-----------------------------------------------------------------------------------------------------------|----------------------------------------------------------------------------------------------------------------------------------------------------------------------------------------------------------------------------------------------------------------------------------------------------------------------------------------------------------------------------------------------------------------------------------------------------------------|--------------------------------------------------|

**Video No. 2- Importance of first 1000 days**

| S.NO | Question                                                                                                                                             | Response                                                                                                                                                                                                                                                                                                                                                                                                                                                                                                                                                                                                                                |
|------|------------------------------------------------------------------------------------------------------------------------------------------------------|-----------------------------------------------------------------------------------------------------------------------------------------------------------------------------------------------------------------------------------------------------------------------------------------------------------------------------------------------------------------------------------------------------------------------------------------------------------------------------------------------------------------------------------------------------------------------------------------------------------------------------------------|
| 2    | Has anyone in your community shared information on the <b>Importance of first 1000 days</b> with you in the last 3 months?                           | <b>Yes...1</b><br><b>No...2 If NO SKIP to 3</b>                                                                                                                                                                                                                                                                                                                                                                                                                                                                                                                                                                                         |
| 2.1  | Who /what is the source of this information?                                                                                                         | Index SHG member... <b>1</b><br>AWW... <b>2</b><br>AHSA.... <b>3</b><br>ANM... <b>4</b><br>Doctor..... <b>5</b><br>Others within the HH: <b>6</b><br>Others outside the HH<br>(if not index SHG member)... <b>7</b><br>Radio.... <b>8</b><br>TV..... <b>9</b><br>Newspaper..... <b>10</b><br>Others, specify: _____                                                                                                                                                                                                                                                                                                                     |
| 2.2  | What specific message about the Importance of first 1000 days video did [Name of SHG member] share with you in the last 3 months? And how many times | Pregnant woman should eat an extra meal a day..... <b>1 Times</b> <input type="checkbox"/><br>Breastfeeding mothers should eat 2 extra meals a day..... <b>2 Times</b> <input type="checkbox"/><br>Institutional delivery..... <b>3 Times</b> <input type="checkbox"/><br>Initiate breastfeeding during first hour of birth..... <b>4 Times</b> <input type="checkbox"/><br>Exclusive breastfeeding in the first 6 months..... <b>5 Times</b> <input type="checkbox"/><br><br>Introduction of Complementary feeding along with breastfeeding from 6 <sup>th</sup> month to the 24th months..... <b>6 Times</b> <input type="checkbox"/> |

|            |                                                                                                                                                                                        |                                                                                                                                                                                                                                                                                                                                                                                                            |
|------------|----------------------------------------------------------------------------------------------------------------------------------------------------------------------------------------|------------------------------------------------------------------------------------------------------------------------------------------------------------------------------------------------------------------------------------------------------------------------------------------------------------------------------------------------------------------------------------------------------------|
| <b>2.3</b> | What did [NAME] convey about <b>the importance of first 1000 days</b>                                                                                                                  | Important for physical and mental development of the baby... <b>1</b><br><b>OTHER CODES.....2</b>                                                                                                                                                                                                                                                                                                          |
| <b>2.4</b> | Did you completely understand the message when it was shared to you?                                                                                                                   | Yes, completely understood the entire message/practice that was shared..... <b>1</b><br>2-No, did not understand first but asked questions which the informant answered..... <b>2</b><br>3-No, did not understand even after asking questions because informant could not answer..... <b>3</b><br>4-No, did not understand and did not ask questions... <b>4</b>                                           |
| <b>2.5</b> | Have you tested any of the recommended behaviors that were shared to you?<br><b>If respondent not in first 1000day period/relevant case, skip to 2.9</b><br><b>If tested, skip 2.7</b> | Haven't tested..... <b>1</b><br><br>Ate an extra meal (if woman is pregnant) ..... <b>2</b><br>Ate 2 extra meals (if lactating mother)..... <b>3</b><br>Had an institutional delivery..... <b>4</b><br>Exclusively breastfed the baby for first six months..... <b>5</b><br>Started complementary feeding from 6 <sup>th</sup> month and continued till the 24 <sup>th</sup> month..... <b>6</b>           |
| <b>2.6</b> | If you have not tested the behavior/practice, why not?<br><b>if not tested skip to 2.9</b>                                                                                             | Did not think important.... <b>1</b><br>Lack of opportunity..... <b>2</b><br>Thought it was too complex.... <b>3</b><br>Did not understand the information well.... <b>4</b><br>Resource constraints.... <b>5</b><br>Lack of family support... <b>6</b><br>Other, explain... <b>7</b>                                                                                                                      |
| <b>2.7</b> | Which of the practices did you adopt consistently                                                                                                                                      | Haven't adopted..... <b>1</b><br><br>Ate an extra meal (if woman is pregnant) ..... <b>2</b><br>Ate 2 extra meals (if lactating mother)..... <b>3</b><br>Had an institutional delivery (for other deliveries)..... <b>4</b><br>Exclusively breastfed the baby for first six months..... <b>5</b><br>Started complementary feeding from 6 <sup>th</sup> month and continued till the 24 <sup>th</sup> month |

|             |                                                                                                           |                                                                                                                                                                                                                                                                                                                                                                                                                                               |
|-------------|-----------------------------------------------------------------------------------------------------------|-----------------------------------------------------------------------------------------------------------------------------------------------------------------------------------------------------------------------------------------------------------------------------------------------------------------------------------------------------------------------------------------------------------------------------------------------|
| <b>2.8</b>  | If you have not adopted the behavior/practice, why not?                                                   | Did not think important....1<br>Lack of opportunity.....2<br>Thought it was too complex....3<br>Did not understand the information well....4<br>Resource constraints....5<br>Lack of family support...6<br>Other, explain...7                                                                                                                                                                                                                 |
| <b>2.9</b>  | Have you shared the messages you heard about 1000 day practices with any one                              | Yes.....1, <b>if yes, skip to 2.11</b><br>NO.....2                                                                                                                                                                                                                                                                                                                                                                                            |
| <b>2.10</b> | If no, why? (note the qualitative response in the box)                                                    | Did not think important....1<br>Lack of opportunity.....2<br>Thought it was too complex....3<br>Did not understand the information well....4<br>Did not think people will adopt....5<br>Other, explain...6                                                                                                                                                                                                                                    |
| <b>2.11</b> | What specific practices did you recommend? And to whom (note the details of the person to follow-up with) | Pregnant woman should eat an extra meal a day..... <b>1</b><br>Breastfeeding mothers should eat 2 extra meals a day..... <b>2</b><br>Institutional delivery..... <b>3</b><br>Initiate breastfeeding during first hour of birth..... <b>4</b><br>Exclusive breastfeeding in the first 6 months..... <b>5</b><br><br>Introduction of Complementary feeding along with breastfeeding from 6 <sup>th</sup> month to the 24th months..... <b>6</b> |
|             |                                                                                                           | <b>WHOM and relationship:<br/>(for follow up)</b>                                                                                                                                                                                                                                                                                                                                                                                             |



### Video No. 3- Importance of Iron Folic tablet

| S.NO       | Question                                                                                                                       | Response                                                                                                                                                                                                                                                                                                                                                                                                                                                                                                                                              |
|------------|--------------------------------------------------------------------------------------------------------------------------------|-------------------------------------------------------------------------------------------------------------------------------------------------------------------------------------------------------------------------------------------------------------------------------------------------------------------------------------------------------------------------------------------------------------------------------------------------------------------------------------------------------------------------------------------------------|
| <b>3</b>   | Has anyone in your community shared information on the <b>importance of iron folic tablet</b> with you in the last 3 months?   | <b>Yes...1</b><br><b>No...2 If NO SKIP to 4</b>                                                                                                                                                                                                                                                                                                                                                                                                                                                                                                       |
| <b>3.1</b> | Who /what is the source of this information?                                                                                   | Index SHG member... <b>1</b><br>AWW... <b>2</b><br>AHSA.... <b>3</b><br>ANM... <b>4</b><br>Doctor..... <b>5</b><br>Others within the HH: <b>6</b><br>Others outside the HH<br>(if not index SHG member)... <b>7</b><br>Radio.... <b>8</b><br>TV..... <b>9</b><br>Newspaper..... <b>10</b><br>Others, specify: _____                                                                                                                                                                                                                                   |
| <b>3.2</b> | What specific message about iron folic tablet did [Name of SHG member] share with you in the last 3 months? And how many times | There is a government scheme providing IFA tablets to pregnant women and adolescents..... <b>1 Times</b> <input type="checkbox"/><br>IFA helps in preventing anemia..... <b>2 Times</b> <input type="checkbox"/><br>Anemia can cause small/low birth weight babies or premature birth..... <b>3Times</b> <input type="checkbox"/><br>Pregnant women should take IFA tablets starting their second trimester..... <b>4 Times</b> <input type="checkbox"/><br>Adolescent girls should take from 10-19years..... <b>5 Times</b> <input type="checkbox"/> |

|     |                                                                                                                                                                                                                    |                                                                                                                                                                                                                                                                                                                                                                            |
|-----|--------------------------------------------------------------------------------------------------------------------------------------------------------------------------------------------------------------------|----------------------------------------------------------------------------------------------------------------------------------------------------------------------------------------------------------------------------------------------------------------------------------------------------------------------------------------------------------------------------|
| 3.3 | <p>What did [NAME] convey about <b>preventing the side effects of taking IFA tablets</b></p> <p><i>Check all that apply</i></p>                                                                                    | <p>Take IFA tablets after the evening meal (not on an empty stomach).....<b>1</b></p> <p>Drink extra water.....<b>2</b></p> <p>Eat good amount of green leafy vegetables and fruits.....<b>3</b></p>                                                                                                                                                                       |
| 3.4 | <p>What did [NAME] convey about <b>the benefit of taking IFA tablets</b></p> <p><i>Check all that apply</i></p>                                                                                                    | <p>Mother will be stronger and healthier during pregnancy.....<b>1</b></p> <p>Mother will be stronger and healthier during birth.....<b>2</b></p> <p>Mother will give birth to a healthy baby and not premature delivery .....<b>3</b></p> <p>Mother will give birth to a healthy baby and not too small/low birth weight.....<b>4</b></p> <p><b>OTHER CODES.....5</b></p> |
| 3.5 | <p>Did you completely understand the message when it was shared to you?</p>                                                                                                                                        | <p>Yes, completely understood the entire message/practice that was shared.....1</p> <p>2-No, did not understand first but asked questions which the informant answered.....2</p> <p>3-No, did not understand even after asking questions because informant could not answer.....3</p> <p>4-No, did not understand and did not ask questions...4</p>                        |
| 3.6 | <p>Have you tested any of the recommended behaviors that were shared to you?</p> <p><b>If respondent not a pregnant woman/ adolescent girl/relevant case, skip to 3.8</b></p> <p><b>If tested, skip to 3.8</b></p> | <p>Haven't tested.....<b>1</b></p> <p>Have taken IFA tablets.....<b>2</b></p>                                                                                                                                                                                                                                                                                              |

|             |                                                                                              |                                                                                                                                                                                                                               |
|-------------|----------------------------------------------------------------------------------------------|-------------------------------------------------------------------------------------------------------------------------------------------------------------------------------------------------------------------------------|
| <b>3.7</b>  | If you have not tested the behavior/practice, why not?<br><b>if not tested, skip to 3.10</b> | Did not think important....1<br>Lack of opportunity.....2<br>Thought it was too complex....3<br>Did not understand the information well....4<br>Resource constraints....5<br>Lack of family support...6<br>Other, explain...7 |
| <b>3.8</b>  | Which of the practices did you adopt consistently                                            | Haven't adopted.....1<br><br>Have adopted the practice of taking IFA tablets.....2                                                                                                                                            |
| <b>3.9</b>  | If you have not adopted the behavior/practice, why not?                                      | Did not think important....1<br>Lack of opportunity.....2<br>Thought it was too complex....3<br>Did not understand the information well....4<br>Resource constraints....5<br>Lack of family support...6<br>Other, explain...7 |
| <b>3.10</b> | Have you shared the messages you heard about hand washing practices with any one             | Yes.....1, <b>if yes, skip to 3.12</b><br>NO.....2                                                                                                                                                                            |

|             |                                                                                                           |                                                                                                                                                                                                                                                                                                                                                     |                                                  |
|-------------|-----------------------------------------------------------------------------------------------------------|-----------------------------------------------------------------------------------------------------------------------------------------------------------------------------------------------------------------------------------------------------------------------------------------------------------------------------------------------------|--------------------------------------------------|
| <b>3.11</b> | If no, why? (note the qualitative response in the box)                                                    | Did not think important....1<br>Lack of opportunity.....2<br>Thought it was too complex....3<br>Did not understand the information well....4<br>Did not think people will adopt....5<br>Other, explain...6                                                                                                                                          |                                                  |
| <b>3.12</b> | What specific practices did you recommend? And to whom (note the details of the person to follow-up with) | There is a government scheme providing IFA tablets to pregnant women and adolescents.....1<br>IFA helps in preventing anemia.....2<br>Anemia can cause small/low birth weight babies or premature birth.....3<br>Pregnant women should take IFA tablets starting their second trimester.....4<br>Adolescent girls should take from 10-19years.....5 | <b>WHOM and relationship:</b><br>(for follow up) |

#### Video No.4 – Maternal Diet and Food Taboos

| S.NO | Question                                                                                                                                       | Response                                                                                                                                                                                                                                                                                                                                                                                                                        |
|------|------------------------------------------------------------------------------------------------------------------------------------------------|---------------------------------------------------------------------------------------------------------------------------------------------------------------------------------------------------------------------------------------------------------------------------------------------------------------------------------------------------------------------------------------------------------------------------------|
| 4    | Has anyone in your community shared information on the importance of <b>maternal diet and about food taboos</b> with you in the last 3 months? | <b>Yes...1</b><br><b>No...2 If NO SKIP to 5</b>                                                                                                                                                                                                                                                                                                                                                                                 |
| 4.1  | Who /what is the source of this information?                                                                                                   | Index SHG member... <b>1</b><br>AWW... <b>2</b><br>AHSA.... <b>3</b><br>ANM... <b>4</b><br>Doctor..... <b>5</b><br>Others within the HH: <b>6</b><br>Others outside the HH<br>(if not index SHG member)... <b>7</b><br>Radio.... <b>8</b><br>TV..... <b>9</b><br>Newspaper..... <b>10</b><br>Others, specify: _____                                                                                                             |
| 4.2  | What specific message about maternal diet and food taboos did [Name of SHG member] share with you in the last 3 months? And how many times     | Eat one additional meal during pregnancy and two additional meals during breastfeeding..... <b>1</b> Times <input type="text"/><br><br>Eat green leafy vegetables, seasonal fruits and also animal source foods<br>(2-3 times a week) ..... <b>2</b> Times <input type="text"/><br><br>Not eating adequately during pregnancy will lead to premature birth/ low birth weight<br>Babies..... <b>3</b> Times <input type="text"/> |

|            |                                                                                                                                                                                    |                                                                                                                                                                                                                                                                                                                                                                  |
|------------|------------------------------------------------------------------------------------------------------------------------------------------------------------------------------------|------------------------------------------------------------------------------------------------------------------------------------------------------------------------------------------------------------------------------------------------------------------------------------------------------------------------------------------------------------------|
| <b>4.3</b> | What did [NAME] convey about <b>the importance of maternal diet or about food taboos</b><br><i>Check all that apply</i>                                                            | Prevents premature birth and low birth weight babies... <b>1</b><br><b>OTHER CODES.....2</b>                                                                                                                                                                                                                                                                     |
| <b>4.4</b> | Did you completely understand the message when it was shared to you?                                                                                                               | Yes, completely understood the entire message/practice that was shared..... <b>1</b><br>2-No, did not understand first but asked questions which the informant answered..... <b>2</b><br>3-No, did not understand even after asking questions because informant could not answer..... <b>3</b><br>4-No, did not understand and did not ask questions... <b>4</b> |
| <b>4.5</b> | Have you tested any of the recommended behaviors that were shared to you?<br><b>If respondent not a pregnant woman/relevant case, skip to 4.9</b><br><b>If tested, skip to 4.7</b> | Haven't tested..... <b>1</b><br><br>Ate one additional meal during pregnancy and two additional meals during breastfeeding..... <b>2</b><br>Ate green leafy vegetables, seasonal fruits and also animal source foods (2-3 times a week) ..... <b>3</b>                                                                                                           |
| <b>4.6</b> | If you have not tested the behavior/practice, why not?<br><b>if not tested, skip to 4.9</b>                                                                                        | Did not think important.... <b>1</b><br>Lack of opportunity..... <b>2</b><br>Thought it was too complex.... <b>3</b><br>Did not understand the information well.... <b>4</b><br>Resource constraints.... <b>5</b><br>Lack of family support... <b>6</b><br>Other, explain... <b>7</b>                                                                            |

|             |                                                                                         |                                                                                                                                                                                                                                                                                                               |
|-------------|-----------------------------------------------------------------------------------------|---------------------------------------------------------------------------------------------------------------------------------------------------------------------------------------------------------------------------------------------------------------------------------------------------------------|
| <b>4.7</b>  | Which of the practices did you adopt consistently                                       | <p>Haven't adopted.....<b>1</b></p> <p>Ate one additional meal during pregnancy and two additional meals during breastfeeding.....<b>2</b></p> <p>Ate green leafy vegetables, seasonal fruits and also animal source foods (2-3 times a week) .....<b>3</b></p>                                               |
| <b>4.8</b>  | If you have not adopted the behavior/practice, why not?                                 | <p>Did not think important....<b>1</b></p> <p>Lack of opportunity.....<b>2</b></p> <p>Thought it was too complex....<b>3</b></p> <p>Did not understand the information well....<b>4</b></p> <p>Resource constraints....<b>5</b></p> <p>Lack of family support...<b>6</b></p> <p>Other, explain...<b>7</b></p> |
| <b>4.9</b>  | Have you shared the messages you heard about maternal diet and food taboos with any one | <p>Yes.....<b>1, if yes, skip to 4.11</b></p> <p>NO.....<b>2</b></p>                                                                                                                                                                                                                                          |
| <b>4.10</b> | If no, why? (note the qualitative response in the box)                                  | <p>Did not think important....<b>1</b></p> <p>Lack of opportunity.....<b>2</b></p> <p>Thought it was too complex....<b>3</b></p> <p>Did not understand the information well....<b>4</b></p> <p>Did not think people will adopt....<b>5</b></p> <p>Other, explain...<b>6</b></p>                               |

|     |                                                                                                           |                                                                                                                                                                                                                                                                                                                                            |                                                         |
|-----|-----------------------------------------------------------------------------------------------------------|--------------------------------------------------------------------------------------------------------------------------------------------------------------------------------------------------------------------------------------------------------------------------------------------------------------------------------------------|---------------------------------------------------------|
| 4.9 | What specific practices did you recommend? And to whom (note the details of the person to follow-up with) | <p>Eat one additional meal during pregnancy and two additional meals during breastfeeding.....<b>1</b></p> <p>Eat green leafy vegetables, seasonal fruits and also animal source foods (2-3 times a week) .....<b>2</b></p> <p>Not eating adequately during pregnancy will lead to premature birth/ low birth weight babies...<b>3</b></p> | <b>WHOM and relationship:</b><br><b>(for follow up)</b> |
|-----|-----------------------------------------------------------------------------------------------------------|--------------------------------------------------------------------------------------------------------------------------------------------------------------------------------------------------------------------------------------------------------------------------------------------------------------------------------------------|---------------------------------------------------------|



### Video No. 5- Maternal Workload during Pregnancy

| S.NO | Question                                                                                                                                        | Response                                                                                                                                                                                                                                                                                                                                                                   |
|------|-------------------------------------------------------------------------------------------------------------------------------------------------|----------------------------------------------------------------------------------------------------------------------------------------------------------------------------------------------------------------------------------------------------------------------------------------------------------------------------------------------------------------------------|
| 5    | Has anyone in your community shared information on maternal workload during pregnancy with you in the last 3 months?                            | Yes...1<br>No...2 If NO SKIP to 6                                                                                                                                                                                                                                                                                                                                          |
| 5.1  | Who /what is the source of this information?                                                                                                    | Index SHG member...1<br>AWW...2<br>AHSA....3<br>ANM...4<br>Doctor.....5<br>Others within the HH: 6<br>Others outside the HH<br>(if not index SHG member)...7<br>Radio....8<br>TV.....9<br>Newspaper.....10<br>Others, specify: _____                                                                                                                                       |
| 5.2  | What specific message about maternal workload during pregnancy did [Name of SHG member] share with you in the last 3 months? And how many times | The need for more rest in the third trimester of pregnancy.....1 Times <input type="text"/><br>Strenuous work in the third trimester can lead to premature birth or low birth weight<br>Babies.....2 Times <input type="text"/><br><br>Family members should support pregnant women by helping with her chores and give more time to rest.....3 Times <input type="text"/> |
| 5.3  | What did [NAME] convey about the benefit of less workload during third trimester of pregnancy?<br><i>Check all that apply</i>                   | Prevents premature birth and low birth weight babies...1<br>OTHER CODES.....2                                                                                                                                                                                                                                                                                              |

|     |                                                                                                                                                                                   |                                                                                                                                                                                                                                                                                                                                  |
|-----|-----------------------------------------------------------------------------------------------------------------------------------------------------------------------------------|----------------------------------------------------------------------------------------------------------------------------------------------------------------------------------------------------------------------------------------------------------------------------------------------------------------------------------|
| 5.4 | Did you completely understand the message when it was shared to you?                                                                                                              | Yes, completely understood the entire message/practice that was shared.....1<br>2-No, did not understand first but asked questions which the informant answered.....2<br>3-No, did not understand even after asking questions because informant could not answer.....3<br>4-No, did not understand and did not ask questions...4 |
| 5.5 | Have you tested any of the recommended behaviors that were shared to you?<br><b>If respondent not a pregnant woman/relevant case, skip to 5.9</b><br><b>If tested skip to 5.7</b> | Haven't tested.....1,<br><br>Takes more rest in the third trimester....2                                                                                                                                                                                                                                                         |
| 5.6 | If you have not tested the behavior/practice, why not?<br><b>if not tested skip to 5.9</b>                                                                                        | Did not think important....1<br>Lack of opportunity.....2<br>Thought it was too complex....3<br>Did not understand the information well....4<br>Resource constraints....5<br>Lack of family support...6<br>Other, explain...7                                                                                                    |
| 5.7 | Which of the practices did you adopt consistently                                                                                                                                 | Haven't adopted.....1<br><br>Takes more rest in the third trimester....2                                                                                                                                                                                                                                                         |

|      |                                                                                                           |                                                                                                                                                                                                                                                                                                         |                                                         |
|------|-----------------------------------------------------------------------------------------------------------|---------------------------------------------------------------------------------------------------------------------------------------------------------------------------------------------------------------------------------------------------------------------------------------------------------|---------------------------------------------------------|
| 5.8  | If you have not adopted the behavior/practice, why not?                                                   | Did not think important....1<br>Lack of opportunity.....2<br>Thought it was too complex....3<br>Did not understand the information well....4<br>Resource constraints....5<br>Lack of family support...6<br>Other, explain...7                                                                           |                                                         |
| 5.9  | Have you shared the messages you heard about maternal workload during pregnancy with any one              | Yes.....1, <b>if yes, skip to 5.11</b><br>NO.....2                                                                                                                                                                                                                                                      |                                                         |
| 5.10 | If no, why? (note the qualitative response in the box)                                                    | Did not think important....1<br>Lack of opportunity.....2<br>Thought it was too complex....3<br>Did not understand the information well....4<br>Did not think people will adopt....5<br>Other, explain...6                                                                                              |                                                         |
| 5.9  | What specific practices did you recommend? And to whom (note the details of the person to follow-up with) | The need for more rest in the third trimester of pregnancy..... <b>1</b><br>Strenuous work in the third trimester can lead to premature birth or low birth weight babies ... <b>2</b><br>Family members should support pregnant women by helping with her chores and give more time to rest... <b>3</b> | <b>WHOM and relationship:</b><br><b>(for follow up)</b> |

### Video No. 6- Importance of Exclusive Breastfeeding

| S.NO | Question                                                                                                                             | Response                                                                                                                                                                                                                                                                                                                                                                                                        |
|------|--------------------------------------------------------------------------------------------------------------------------------------|-----------------------------------------------------------------------------------------------------------------------------------------------------------------------------------------------------------------------------------------------------------------------------------------------------------------------------------------------------------------------------------------------------------------|
| 6    | Has anyone in your community shared information on the <b>importance of exclusive breast feeding</b> with you in the last 3 months?  | <b>Yes...1</b><br><b>No...2 If NO SKIP to 7</b>                                                                                                                                                                                                                                                                                                                                                                 |
| 6.1  | Who /what is the source of this information?                                                                                         | Index SHG member... <b>1</b><br>AWW... <b>2</b><br>AHSA.... <b>3</b><br>ANM... <b>4</b><br>Doctor..... <b>5</b><br>Others within the HH: <b>6</b><br>Others outside the HH<br>(if not index SHG member)... <b>7</b><br>Radio.... <b>8</b><br>TV..... <b>9</b><br>Newspaper..... <b>10</b><br>Others, specify: _____                                                                                             |
| 6.2  | What specific message about exclusive breastfeeding did [Name of SHG member] share with you in the last 3 months? And how many times | Babies should be put to the breast within one hour after birth..... <b>1 Times</b> <input type="checkbox"/><br><br>Babies should be given only breast milk until 6 months and should not be given honey, or any other liquids, not even water..... <b>2Times</b> <input type="checkbox"/><br>Mothers should breastfeed frequently, 'on demand', both day and night..... <b>3 Times</b> <input type="checkbox"/> |

|     |                                                                                                                                                                                      |                                                                                                                                                                                                                                                                                                                                  |
|-----|--------------------------------------------------------------------------------------------------------------------------------------------------------------------------------------|----------------------------------------------------------------------------------------------------------------------------------------------------------------------------------------------------------------------------------------------------------------------------------------------------------------------------------|
| 6.3 | Did you completely understand the message when it was shared to you?                                                                                                                 | Yes, completely understood the entire message/practice that was shared.....1<br>2-No, did not understand first but asked questions which the informant answered.....2<br>3-No, did not understand even after asking questions because informant could not answer.....3<br>4-No, did not understand and did not ask questions...4 |
| 6.4 | Have you tested any of the recommended behaviors that were shared to you?<br><b>If respondent not a lactating mother/relevant case, skip to 6.8</b><br><b>If tested, skip to 6.6</b> | Haven't tested.....1<br><br>Initiated breastfeeding in the first hour of birth.....2<br><br>Exclusively breastfed the baby for first 6 months...3                                                                                                                                                                                |
| 6.5 | If you have not tested the behavior/practice, why not?<br><b>if not tested skip to 6.8</b>                                                                                           | Did not think important....1<br>Lack of opportunity.....2<br>Thought it was too complex....3<br>Did not understand the information well....4<br>Resource constraints....5<br>Lack of family support...6<br>Other, explain...7                                                                                                    |
| 6.6 | Which of the practices did you adopt consistently                                                                                                                                    | Haven't adopted.....1<br>Initiated breastfeeding in the first hour of birth.....2<br><br>Exclusively breastfed the baby for first 6 months...3                                                                                                                                                                                   |

|      |                                                                                                           |                                                                                                                                                                                                                                                                                                                     |                                                         |
|------|-----------------------------------------------------------------------------------------------------------|---------------------------------------------------------------------------------------------------------------------------------------------------------------------------------------------------------------------------------------------------------------------------------------------------------------------|---------------------------------------------------------|
| 6.7  | If you have not tested the behavior/practice, why not?                                                    | Did not think important....1<br>Lack of opportunity.....2<br>Thought it was too complex....3<br>Did not understand the information well....4<br>Resource constraints....5<br>Lack of family support...6<br>Other, explain...7                                                                                       |                                                         |
| 6.8  | Have you shared the messages you heard about hand washing practices with any one                          | Yes.....1, <b>if yes, skip to 6.10</b><br>NO.....2                                                                                                                                                                                                                                                                  |                                                         |
| 6.9  | If no, why? (note the qualitative response in the box)                                                    | Did not think important....1<br>Lack of opportunity.....2<br>Thought it was too complex....3<br>Did not understand the information well....4<br>Did not think people will adopt....5<br>Other, explain...6                                                                                                          |                                                         |
| 6.10 | What specific practices did you recommend? And to whom (note the details of the person to follow-up with) | Babies should be put to the breast within one hour after birth..... <b>1</b><br><br>Babies should be given only breast milk until 6 months and should not be given honey, or any other liquids, not even water..... <b>2</b><br>Mothers should breastfeed frequently, 'on demand', both day and night..... <b>3</b> | <b>WHOM and relationship:</b><br><b>(for follow up)</b> |

### Video No. 7: Managing exclusive breastfeeding by working mother

| S.NO | Question                                                                                                                                                         | Response                                                                                                                                                                                                                                                                                                                                                                                                                                                                                         |
|------|------------------------------------------------------------------------------------------------------------------------------------------------------------------|--------------------------------------------------------------------------------------------------------------------------------------------------------------------------------------------------------------------------------------------------------------------------------------------------------------------------------------------------------------------------------------------------------------------------------------------------------------------------------------------------|
| 7    | Has anyone in your community shared information on <b>managing exclusive breast feeding by working mothers</b> with you in the last 3 months?                    | Yes... <b>1</b><br>No... <b>2</b> If NO SKIP to 8                                                                                                                                                                                                                                                                                                                                                                                                                                                |
| 7.1  | Who /what is the source of this information?                                                                                                                     | Index SHG member... <b>1</b><br>AWW... <b>2</b><br>AHSA.... <b>3</b><br>ANM... <b>4</b><br>Doctor..... <b>5</b><br>Others within the HH: <b>6</b><br>Others outside the HH<br>(if not index SHG member)... <b>7</b><br>Radio.... <b>8</b><br>TV..... <b>9</b><br>Newspaper..... <b>10</b><br>Others, specify: _____                                                                                                                                                                              |
| 7.2  | What specific message about managing exclusive breastfeeding by working mothers did [Name of SHG member] share with you in the last 3 months? And how many times | Working mothers should breastfeed the baby more times in the morning and night, for longer durations, when with the baby..... <b>1 Times</b> <input type="checkbox"/><br><br>Families can support working mothers so that they can exclusively breastfeed their babies until 6 months and continue to breastfeed for up to two years or more..... <b>2Times</b> <input type="checkbox"/><br>Working mothers should express breast milk for the baby..... <b>3 Times</b> <input type="checkbox"/> |

|            |                                                                                                                                                                                                                                     |                                                                                                                                                                                                                                                                                                                                                                                 |
|------------|-------------------------------------------------------------------------------------------------------------------------------------------------------------------------------------------------------------------------------------|---------------------------------------------------------------------------------------------------------------------------------------------------------------------------------------------------------------------------------------------------------------------------------------------------------------------------------------------------------------------------------|
| <b>7.3</b> | <p>When [NAME] shared information with you about <b>how to family can support working mothers to exclusively breastfeed</b> what specific practices were mentioned</p> <p><i>Check all that apply</i></p>                           | <p>Family members can share in the mother's workload in house and outside house also.....<b>1</b></p> <p>A family member can bring the baby to the mother to breastfeed in the field (or other workplace).....<b>2</b></p> <p>A family member can accompany the mother to the field during the day to help take care of the baby while the mother works.....<b>3</b></p>        |
| <b>7.4</b> | Did you completely understand the message when it was shared to you?                                                                                                                                                                | <p>Yes, completely understood the entire message/practice that was shared.....<b>1</b></p> <p>2-No, did not understand first but asked questions which the informant answered.....<b>2</b></p> <p>3-No, did not understand even after asking questions because informant could not answer.....<b>3</b></p> <p>4-No, did not understand and did not ask questions...<b>4</b></p> |
| <b>7.5</b> | <p>Have you tested any of the recommended behaviors that were shared to you?</p> <p><b>If respondent not a working mother with a baby less than 6months old/relevant case, skip to 7.9</b></p> <p><b>If tested, skip to 7.7</b></p> | <p>Haven't tested.....<b>1</b></p> <p>Fed baby for longer hours in the morning and night for more number of times.....<b>2</b></p> <p>Family member brought baby to workplace to be fed.....<b>3</b></p> <p>Expressed breast milk and caregiver fed baby.....<b>4</b></p>                                                                                                       |
| <b>7.6</b> | <p>If you have not tested the behavior/practice, why not?</p> <p><b>if not tested skip to 7.9</b></p>                                                                                                                               | <p>Did not think important....<b>1</b></p> <p>Lack of opportunity.....<b>2</b></p> <p>Thought it was too complex....<b>3</b></p> <p>Did not understand the information well....<b>4</b></p> <p>Resource constraints....<b>5</b></p> <p>Lack of family support...<b>6</b></p> <p>Other, explain...<b>7</b></p>                                                                   |



|             |                                                                                  |                                                                                                                                                                                                                                                                            |
|-------------|----------------------------------------------------------------------------------|----------------------------------------------------------------------------------------------------------------------------------------------------------------------------------------------------------------------------------------------------------------------------|
| <b>7.7</b>  | Which of the practices did you adopt consistently                                | <p>Haven't adopted.....<b>1</b></p> <p>Fed baby for longer hours in the morning and night for more number of times.....<b>2</b></p> <p>Family member brought baby to workplace to be fed.....<b>3</b></p> <p>Expressed breast milk and caregiver fed baby.....<b>4</b></p> |
| <b>7.8</b>  | If you have not adopted the behavior/practice, why not?                          | <p>Did not think important....1</p> <p>Lack of opportunity.....2</p> <p>Thought it was too complex....3</p> <p>Did not understand the information well....4</p> <p>Resource constraints....5</p> <p>Lack of family support...6</p> <p>Other, explain...7</p>               |
| <b>7.9</b>  | Have you shared the messages you heard about hand washing practices with any one | <p>Yes.....1, <b>if yes, skip to 7.11</b></p> <p>NO.....2</p>                                                                                                                                                                                                              |
| <b>7.10</b> | If no, why? (note the qualitative response in the box)                           | <p>Did not think important....1</p> <p>Lack of opportunity.....2</p> <p>Thought it was too complex....3</p> <p>Did not understand the information well....4</p> <p>Did not think people will adopt....5</p> <p>Other, explain...6</p>                                      |

|      |                                                                                                           |                                                                                                                                                                                                                                                                                                                             |                                                         |
|------|-----------------------------------------------------------------------------------------------------------|-----------------------------------------------------------------------------------------------------------------------------------------------------------------------------------------------------------------------------------------------------------------------------------------------------------------------------|---------------------------------------------------------|
| 7.11 | What specific practices did you recommend? And to whom (note the details of the person to follow-up with) | <p>Babies should be put to the breast within one hour after birth.....<b>1</b></p> <p>Babies should be given only breast milk until 6 months and should not be given honey, or any other liquids, not even water.....<b>2</b></p> <p>Mothers should breastfeed frequently, 'on demand', both day and night.....<b>3</b></p> | <b>WHOM and relationship:</b><br><b>(for follow up)</b> |
|------|-----------------------------------------------------------------------------------------------------------|-----------------------------------------------------------------------------------------------------------------------------------------------------------------------------------------------------------------------------------------------------------------------------------------------------------------------------|---------------------------------------------------------|
